# Supplementary material
Source: publisher figshare collection journal article supplement (https://frontiersin.figshare.com/ndownloader/files/24833045)

**Supplementary Figure 1.** Landmark analysis for overall survival at 1months (S. Figure 1-A), 3 months (S. Figure 1-B) and 6 months (S. Figure 1-C) in patients without grade  $\geq 2$  pneumonitis vs patients with grade  $\geq 2$  pneumonitis

**Supplementary Figure 1-A.** Landmark analysis for OS at 1 month

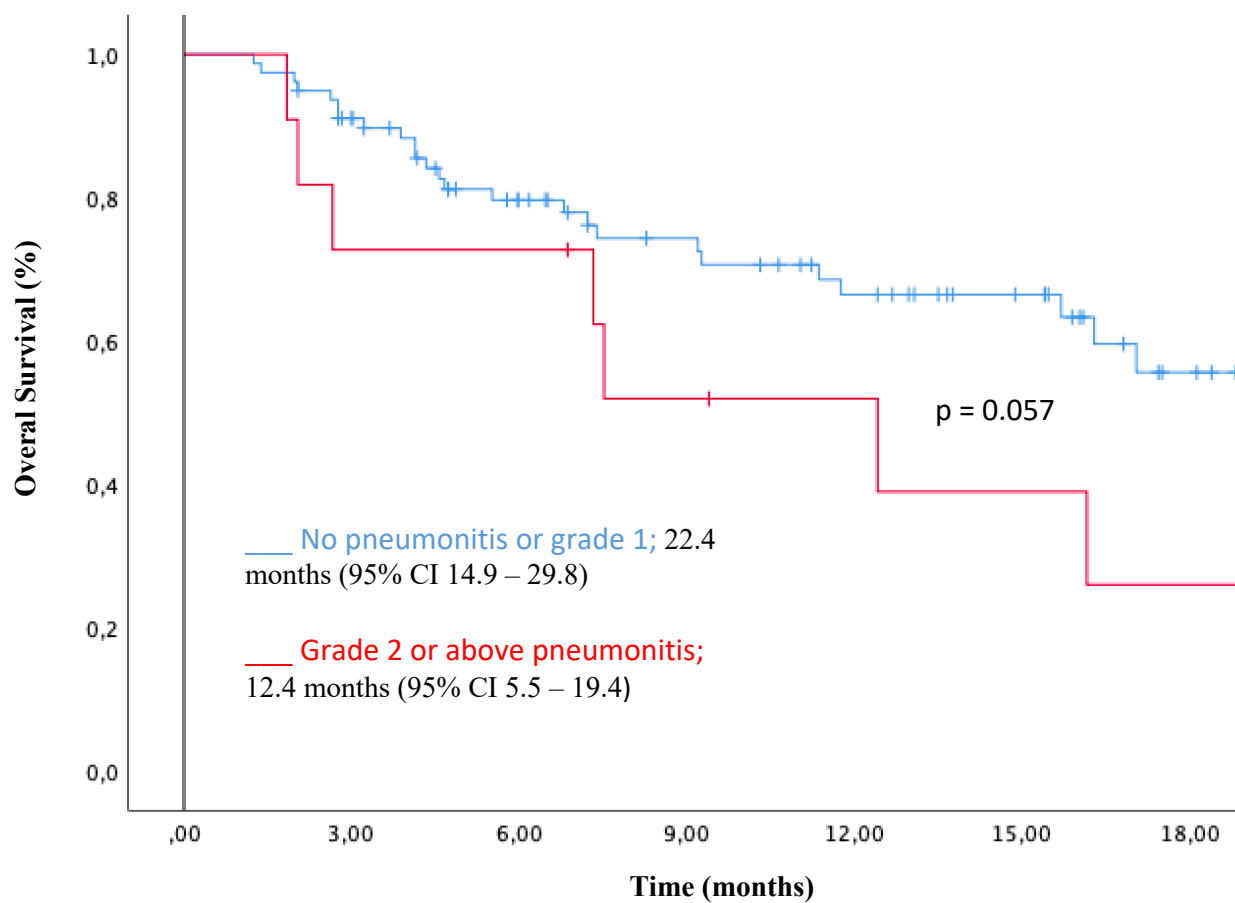

**Supplementary Figure 1-B.** Landmark analysis for OS at 3 months

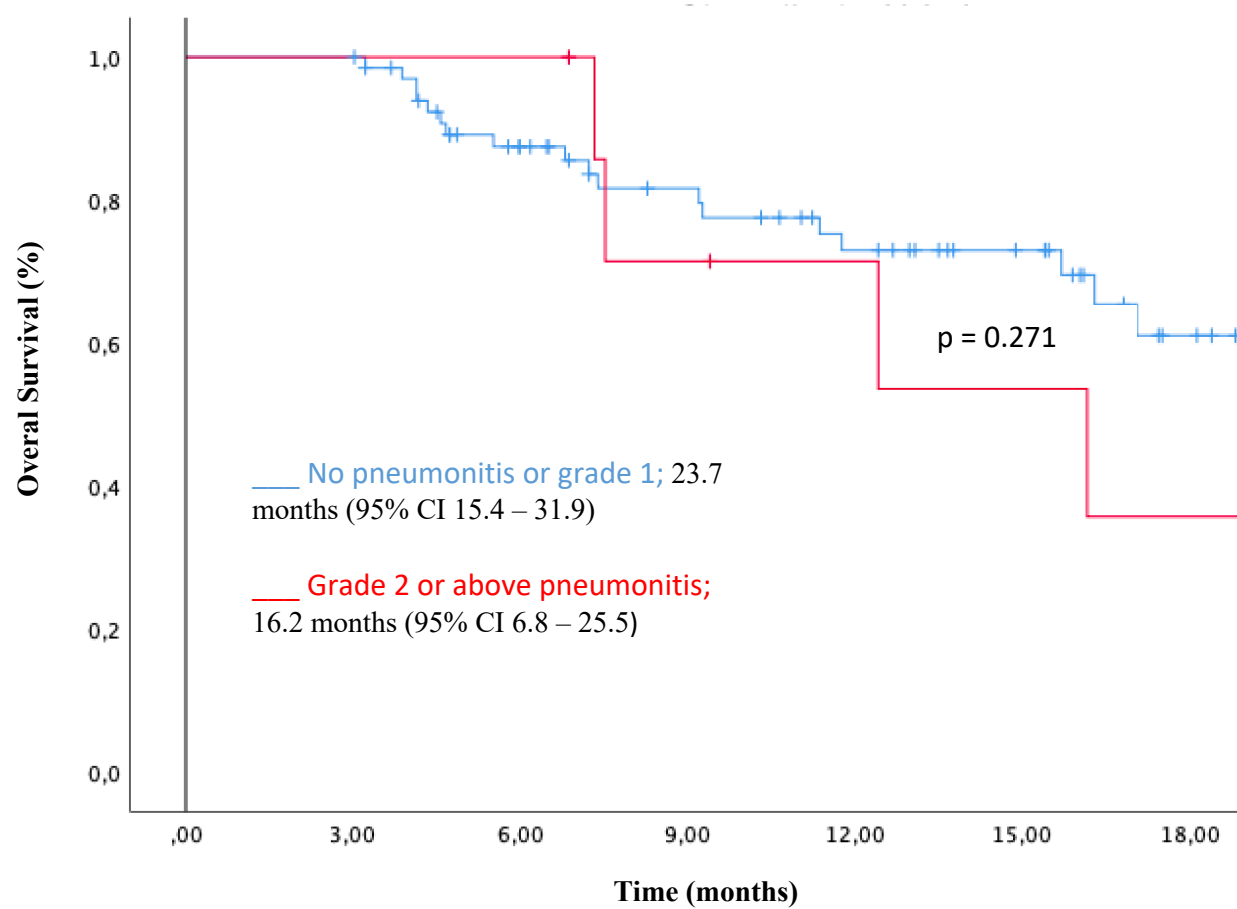

**Supplementary Figure 1-C.** Landmark analysis for OS at 6 months

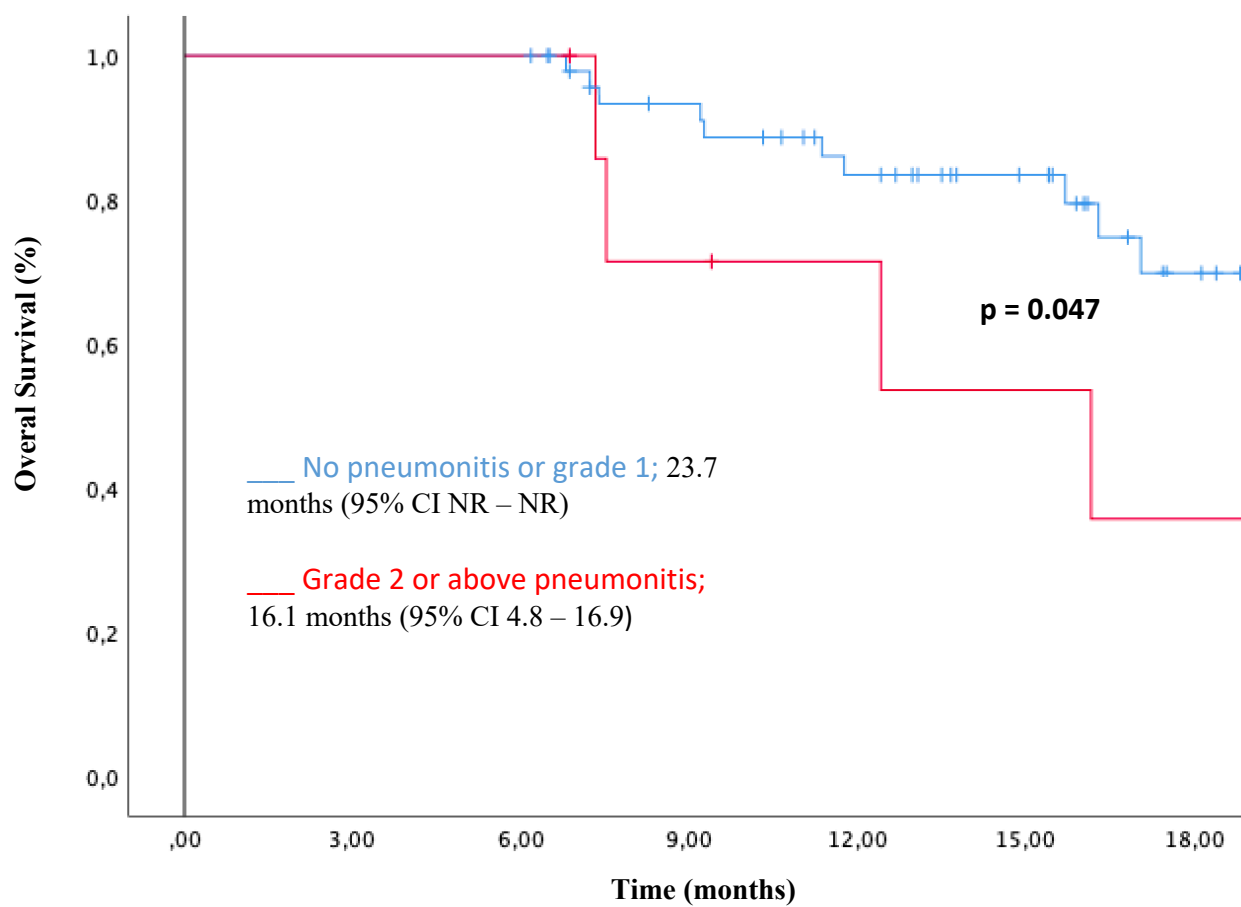

Supplement: Supplementary file [file 24833045]
